# Supplementary material
Source: Springer Nature journal article supplement (https://www.springermedizin.de/resource/supplementary/12879_2011_1735_MOESM1_ESM.pdf/9443914)
Supplement: MOESM1 [file 9443914]

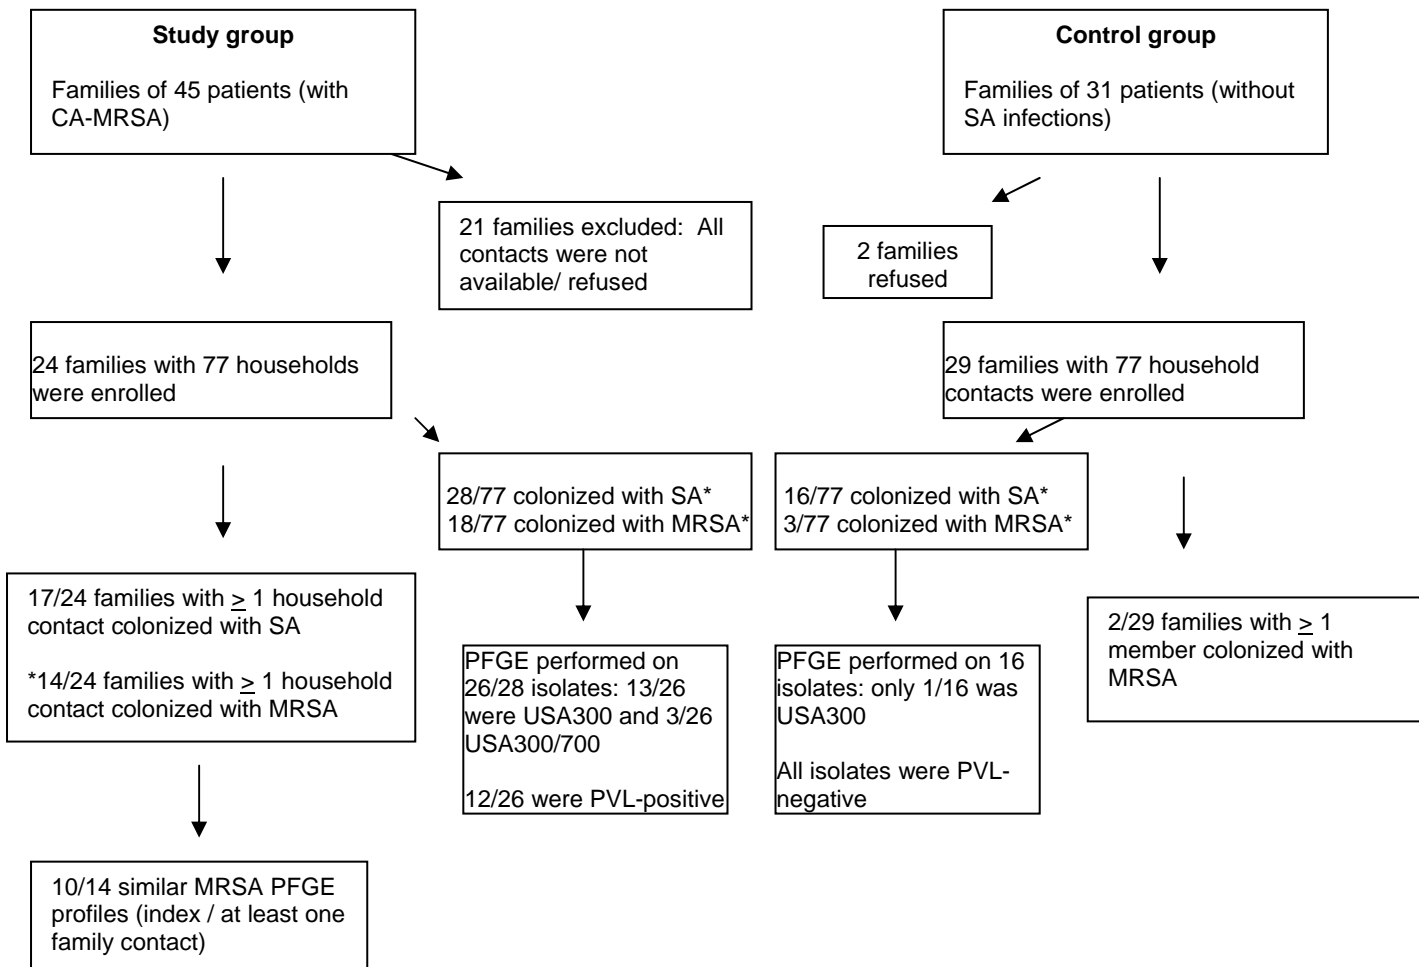

\*p < 0.05 vs control group

SA: *Staphylococcus aureus*

MRSA: methicillin-resistant *Staphylococcus aureus*

PFGE : pulse field gel electrophoresis
